# Supplementary material
Source: PubMed Central journal article supplement (PMC1698885)
Supplement: 7601438s1.pdf [file 7601438s1.pdf]

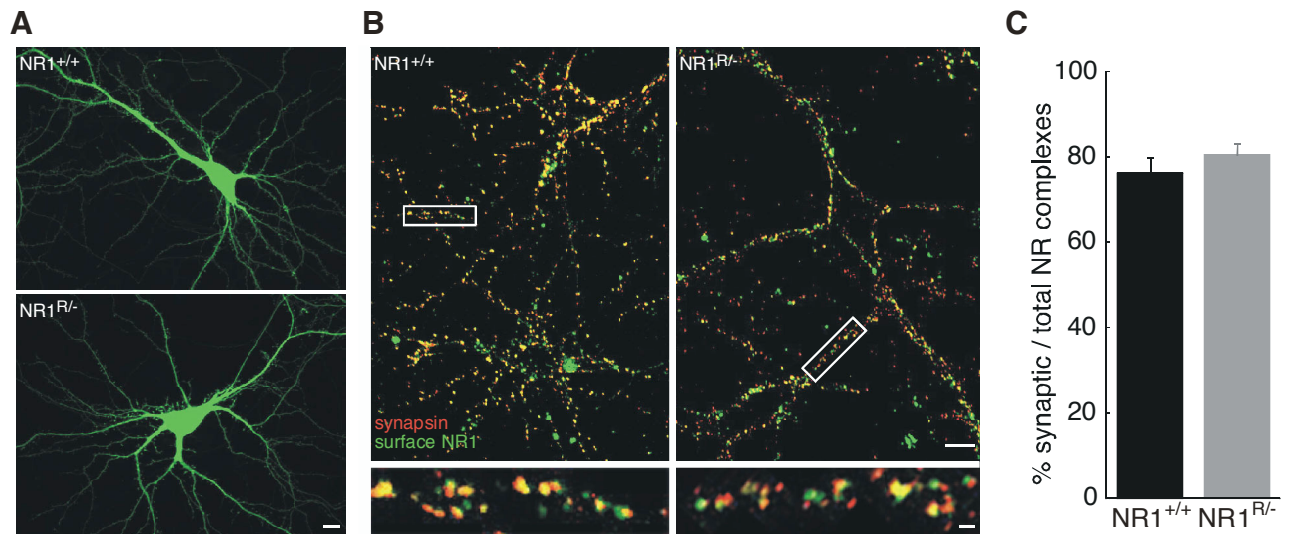

**Figure S1. NR1 surface expression in cultured hippocampal wildtype and NR1(N598R)-mutant neurons.**

(A) EGFP-expressing cells of wildtype (NR1<sup>+/+</sup>) and mutant (NR1<sup>R/-</sup>) neurons (DIV 14, axial projections of confocal stacks; scale bar: 10  $\mu$ m). (B) Surface NR1 is revealed by live anti-panNR1 antibody fluorescence (DIV 21, green). Cells were counterstained for synapsin1 (red) after fixation; details in rectangles are shown underneath; scale bars: 10  $\mu$ m in overview and 1  $\mu$ m in close-up. (C) Quantitative analysis of anti-NR1 staining: 50-100  $\mu$ m stretches of 2-3 dendrites were counted in cells from two separate experiments. NR1<sup>+/+</sup>, 76 $\pm$ 4%, n=9; NR1<sup>R/-</sup>, 81 $\pm$ 2%, n=10; mean $\pm$ SEM.
