# Supplementary material
Source: PubMed Central journal article supplement (PMC1698885)
Supplement: 7601438s2.pdf [file 7601438s2.pdf]

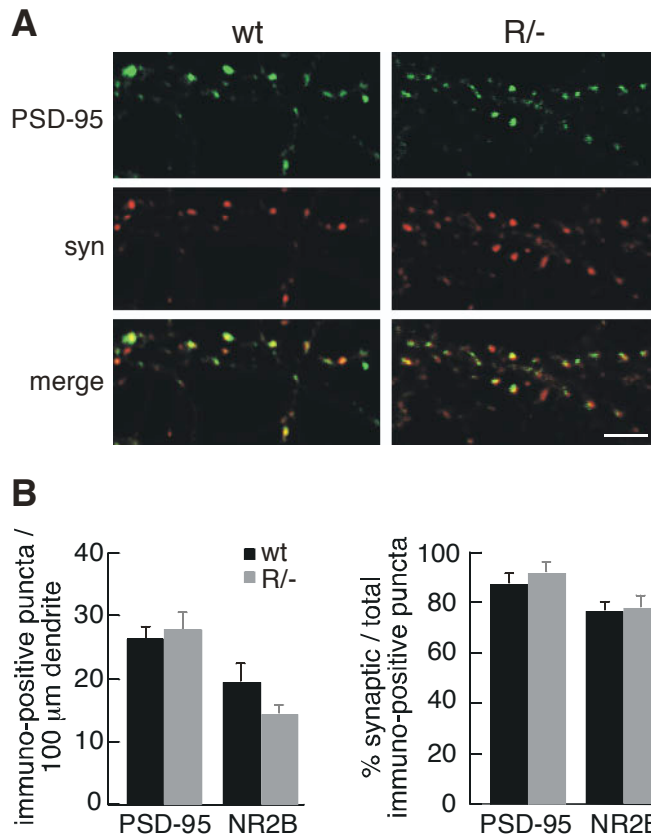

**Figure S2. Structural integrity of the NR complex and synaptic localization of components.**

(A) Neurons expressing wildtype (wt) or calcium impermeable (R/-) NR1 subunits were stained at DIV 21 for PSD-95 (green) and counterstained for synapsin1 (red). scale bar, 5  $\mu$ m.

(B) Analysis of the immunostaining (as in Figure S1) revealed comparable amounts of puncta immunopositive for PSD-95 in both genotypes (per 100  $\mu$ m dendrite: wt,  $26 \pm 2$ , n=18; R/-,  $28 \pm 3$ , n=16) that were also colocalized with synapsin1 to a similar percentage (wt,  $87 \pm 4\%$ , R/-,  $92 \pm 4\%$ ; n=7). For NR2B immuno-positive puncta data were analysed equivalently. Puncta per 100  $\mu$ m dendrite: wt,  $19 \pm 3$ , n=4; R/-,  $14 \pm 2$ , n=5. Percent colocalization with PSD-95 positive structures: wt,  $76 \pm 4\%$ , R/-,  $77 \pm 5\%$ ; n=8. All data are given as mean  $\pm$  SEM.
