# Supplementary material
Source: PubMed Central journal article supplement (PMC1698885)
Supplement: 7601438s3.pdf [file 7601438s3.pdf]

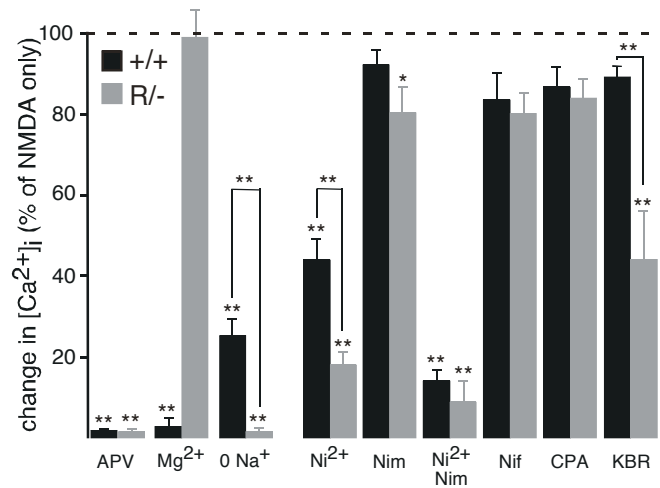

**Figure S3. Sources of Ca<sup>2+</sup> influx in wildtype and R/- cells.**

NMDA-induced somatic Ca<sup>2+</sup> responses in presence of blockers, normalized to the NMDA-only response taken as 100% (in nM: 437±305 for +/+, n=63, and 362±267 for R/-, n=44). For concentrations of agonists and blockers please refer to method and suppl. method sections. All values represent mean±SEM. n<sub>cells</sub>/n<sub>experiments</sub> from left to right: 29/5, 21/4, 4/2, 7/2, 7/2, 5/2, 21/3, 12/3, 20/4, 9/3, 5/2, 7/2, 6/3, 7/3, 6/3, 4/2, 6/3, 7/3. Mann-Whitney U-test for significance: (\*) p<0.05, (\*\*) p<0.01.

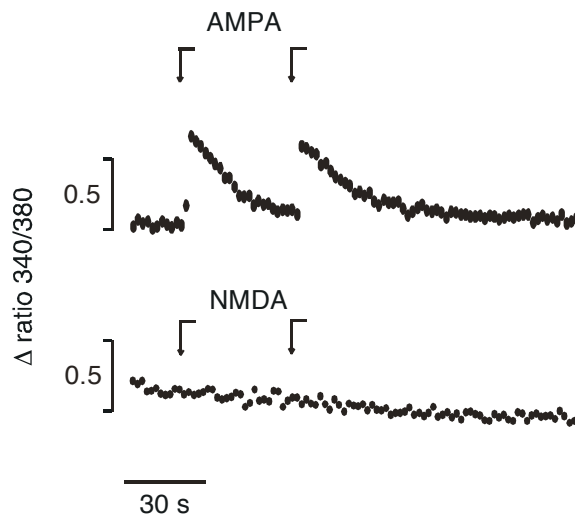

**Figure S4. Ca<sup>2+</sup> influx in NR1 knock-out cells.**

AMPA (100 μM, 10 s) can induce somatic Ca<sup>2+</sup> responses on a NR1 knock-out cell, while NMDA (50 μM, 10 s) does not change ratio<sub>340/380</sub> on the same cell.
