# Supplementary material
Source: PubMed Central journal article supplement (PMC1698885)
Supplement: 7601438s4.pdf [file 7601438s4.pdf]

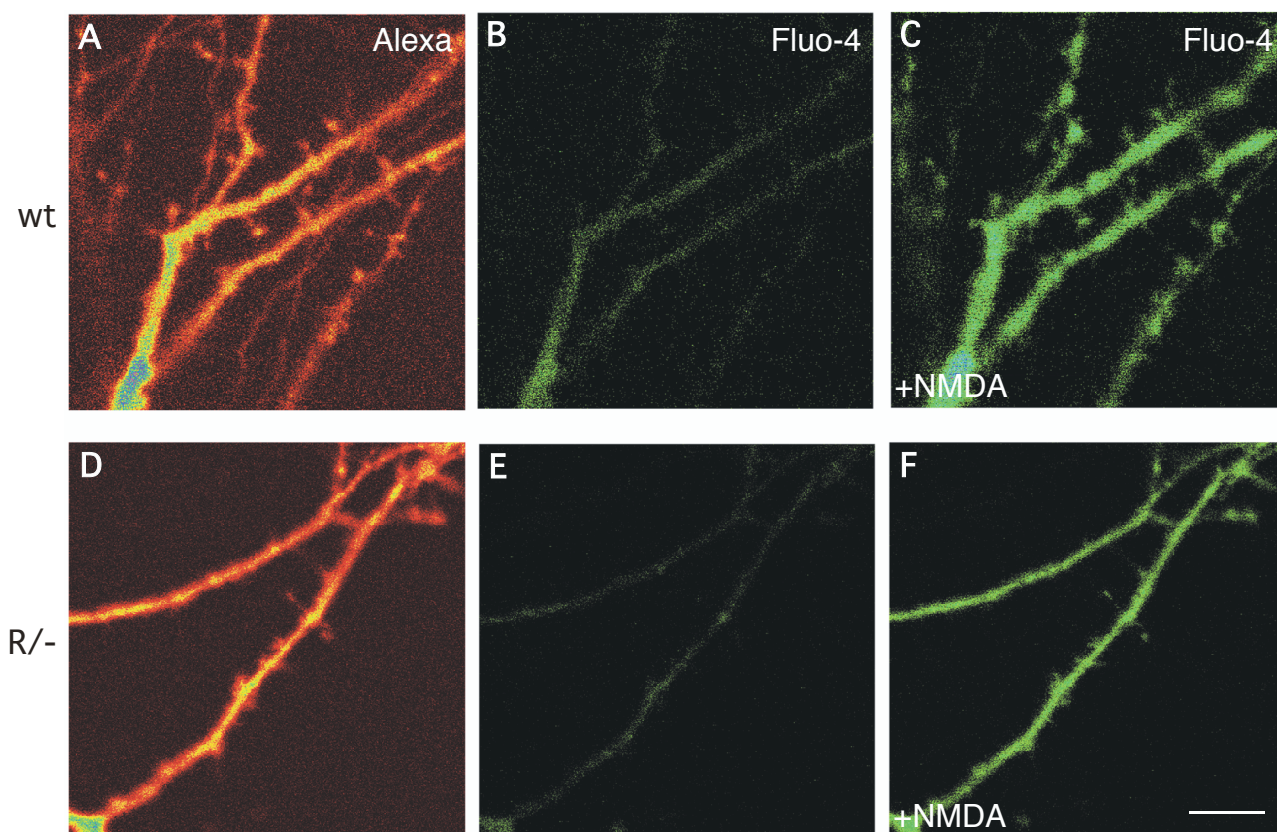

**Figure S5. Bath application of NMDA elevates  $\text{Ca}^{2+}$  in dendrites and dendritic spines in both wild type and mutant cultures.**

(A) A dendritic fragment of a single wildtype cell filled with the dyes Alexa and Fluo-4, imaged in the channel for Alexa fluorescence (red), which remained unchanged throughout the 20 min experiment.

(B-C) Fragment in A imaged in the  $\text{Ca}^{2+}$  sensitive Fluo-4 (green) channel in the baseline conditions (B) and during bath application of 10  $\mu\text{M}$  NMDA (15 min) (C). Elevation of intracellular  $\text{Ca}^{2+}$  is clearly seen within the dendrites and dendritic spines.

(D-F) The same experiment as in A-C, but carried out in the NR1<sup>R/-</sup> mutant. Application of NMDA produces a clear  $\text{Ca}^{2+}$  elevation within the dendrite and spines (F). Scale bar, 3  $\mu\text{m}$ .
