# Supplementary material
Source: PubMed Central journal article supplement (PMC1698885)
Supplement: 7601438s5.pdf [file 7601438s5.pdf]

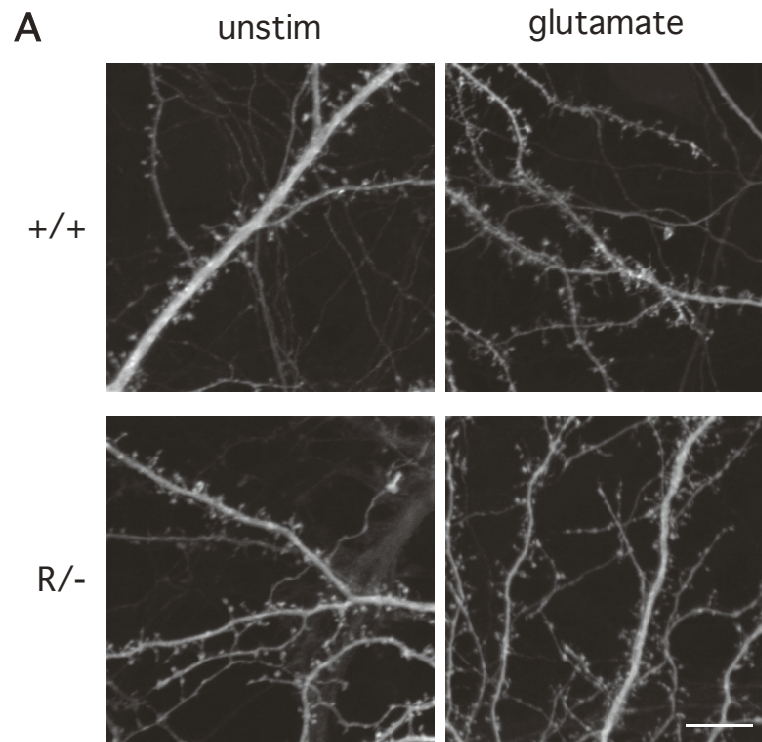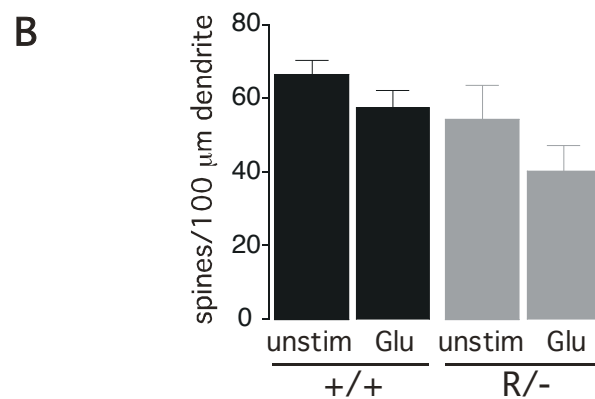

**Figure S6. Morphological integrity of dendrites and spines is preserved after agonist application.**

(A) Dendritic details of cultured hippocampal neurons (DIV 14) from the wildtype (+/+) or NR1<sup>R/-</sup> (R/-) genotypes expressing GFP. For the activation of glutamate receptors, cells were washed with HEPES buffer, incubated for 3 min with glutamate (50  $\mu\text{M}$ ) or vehicle ('unstim') then rinsed and fixed. Dendritic spine structure appeared unaltered by agonist application (axial projections of confocal stacks; scale bar: 10  $\mu\text{m}$ ). (B) Spine density (count/100  $\mu\text{m}$  dendritic length) shown as mean  $\pm$  SEM; n=5. There is neither a statistical difference between genotypes, nor a significant change induced by agonist treatment ( $p > 0.05$ , t test).
